# Supplementary material
Source: publisher figshare collection journal article supplement (https://gsapubs.figshare.com/ndownloader/files/22398639)
Supplement: Supplementary file 1 [file 22398639]

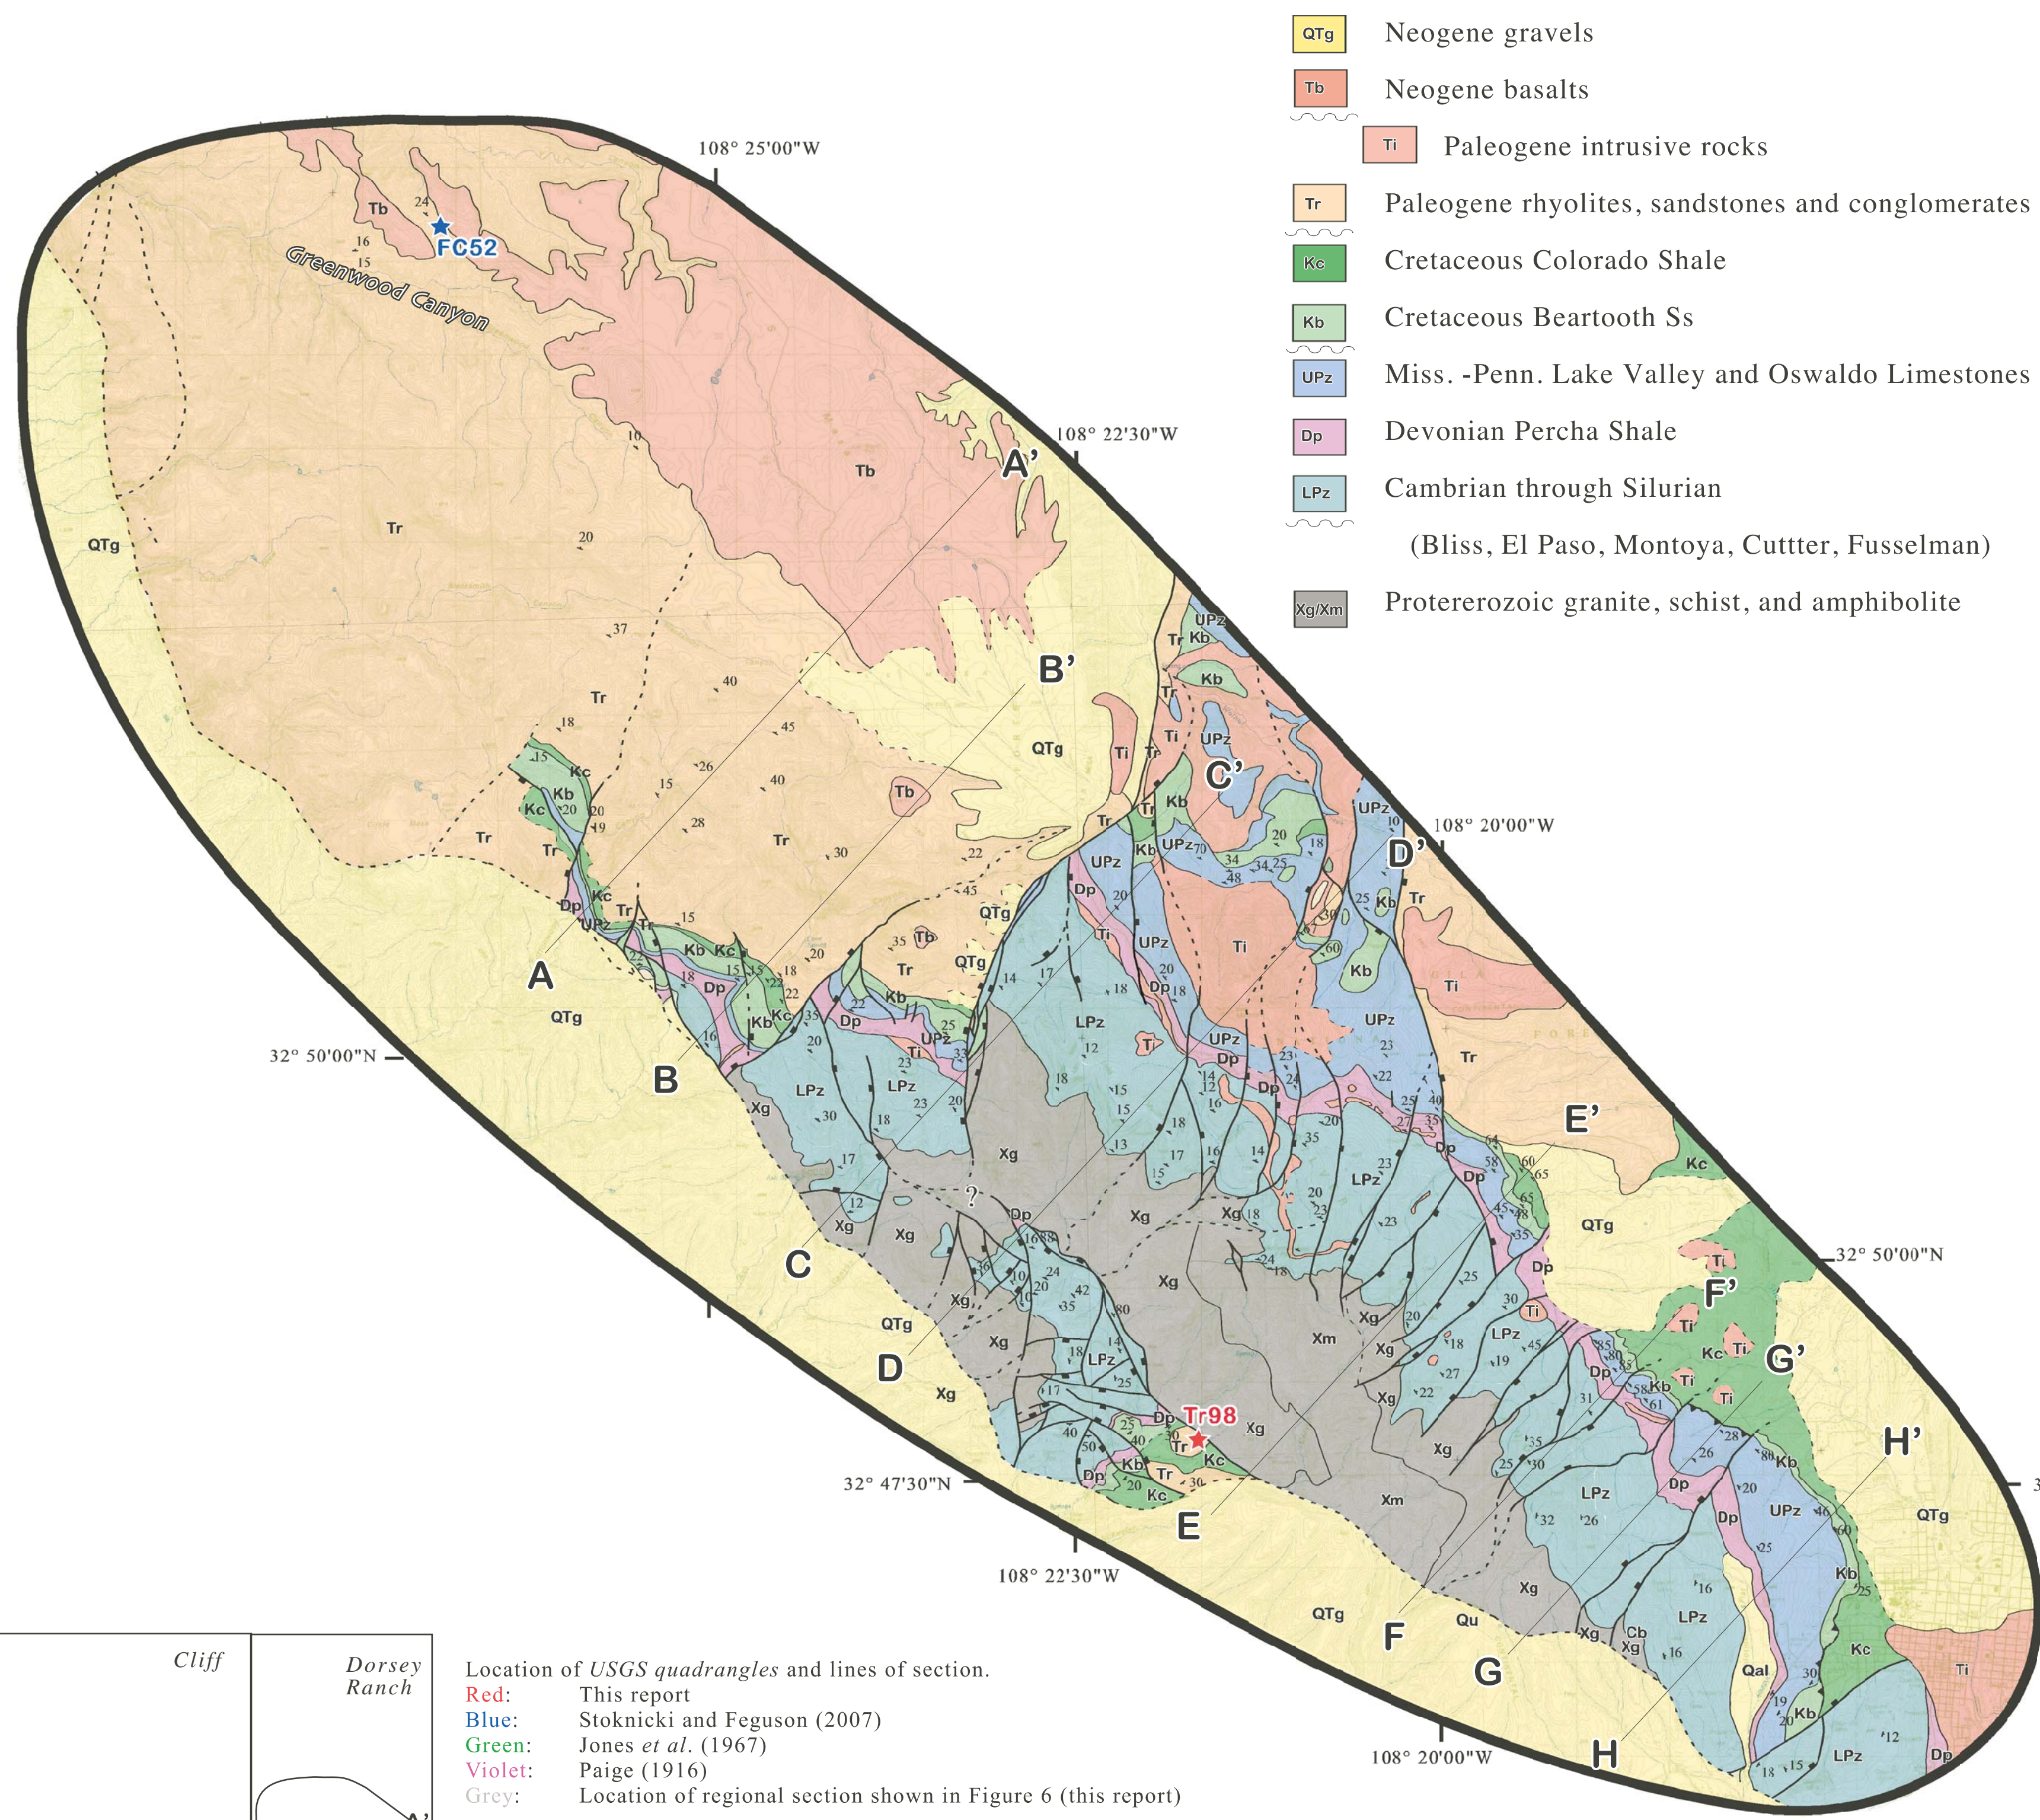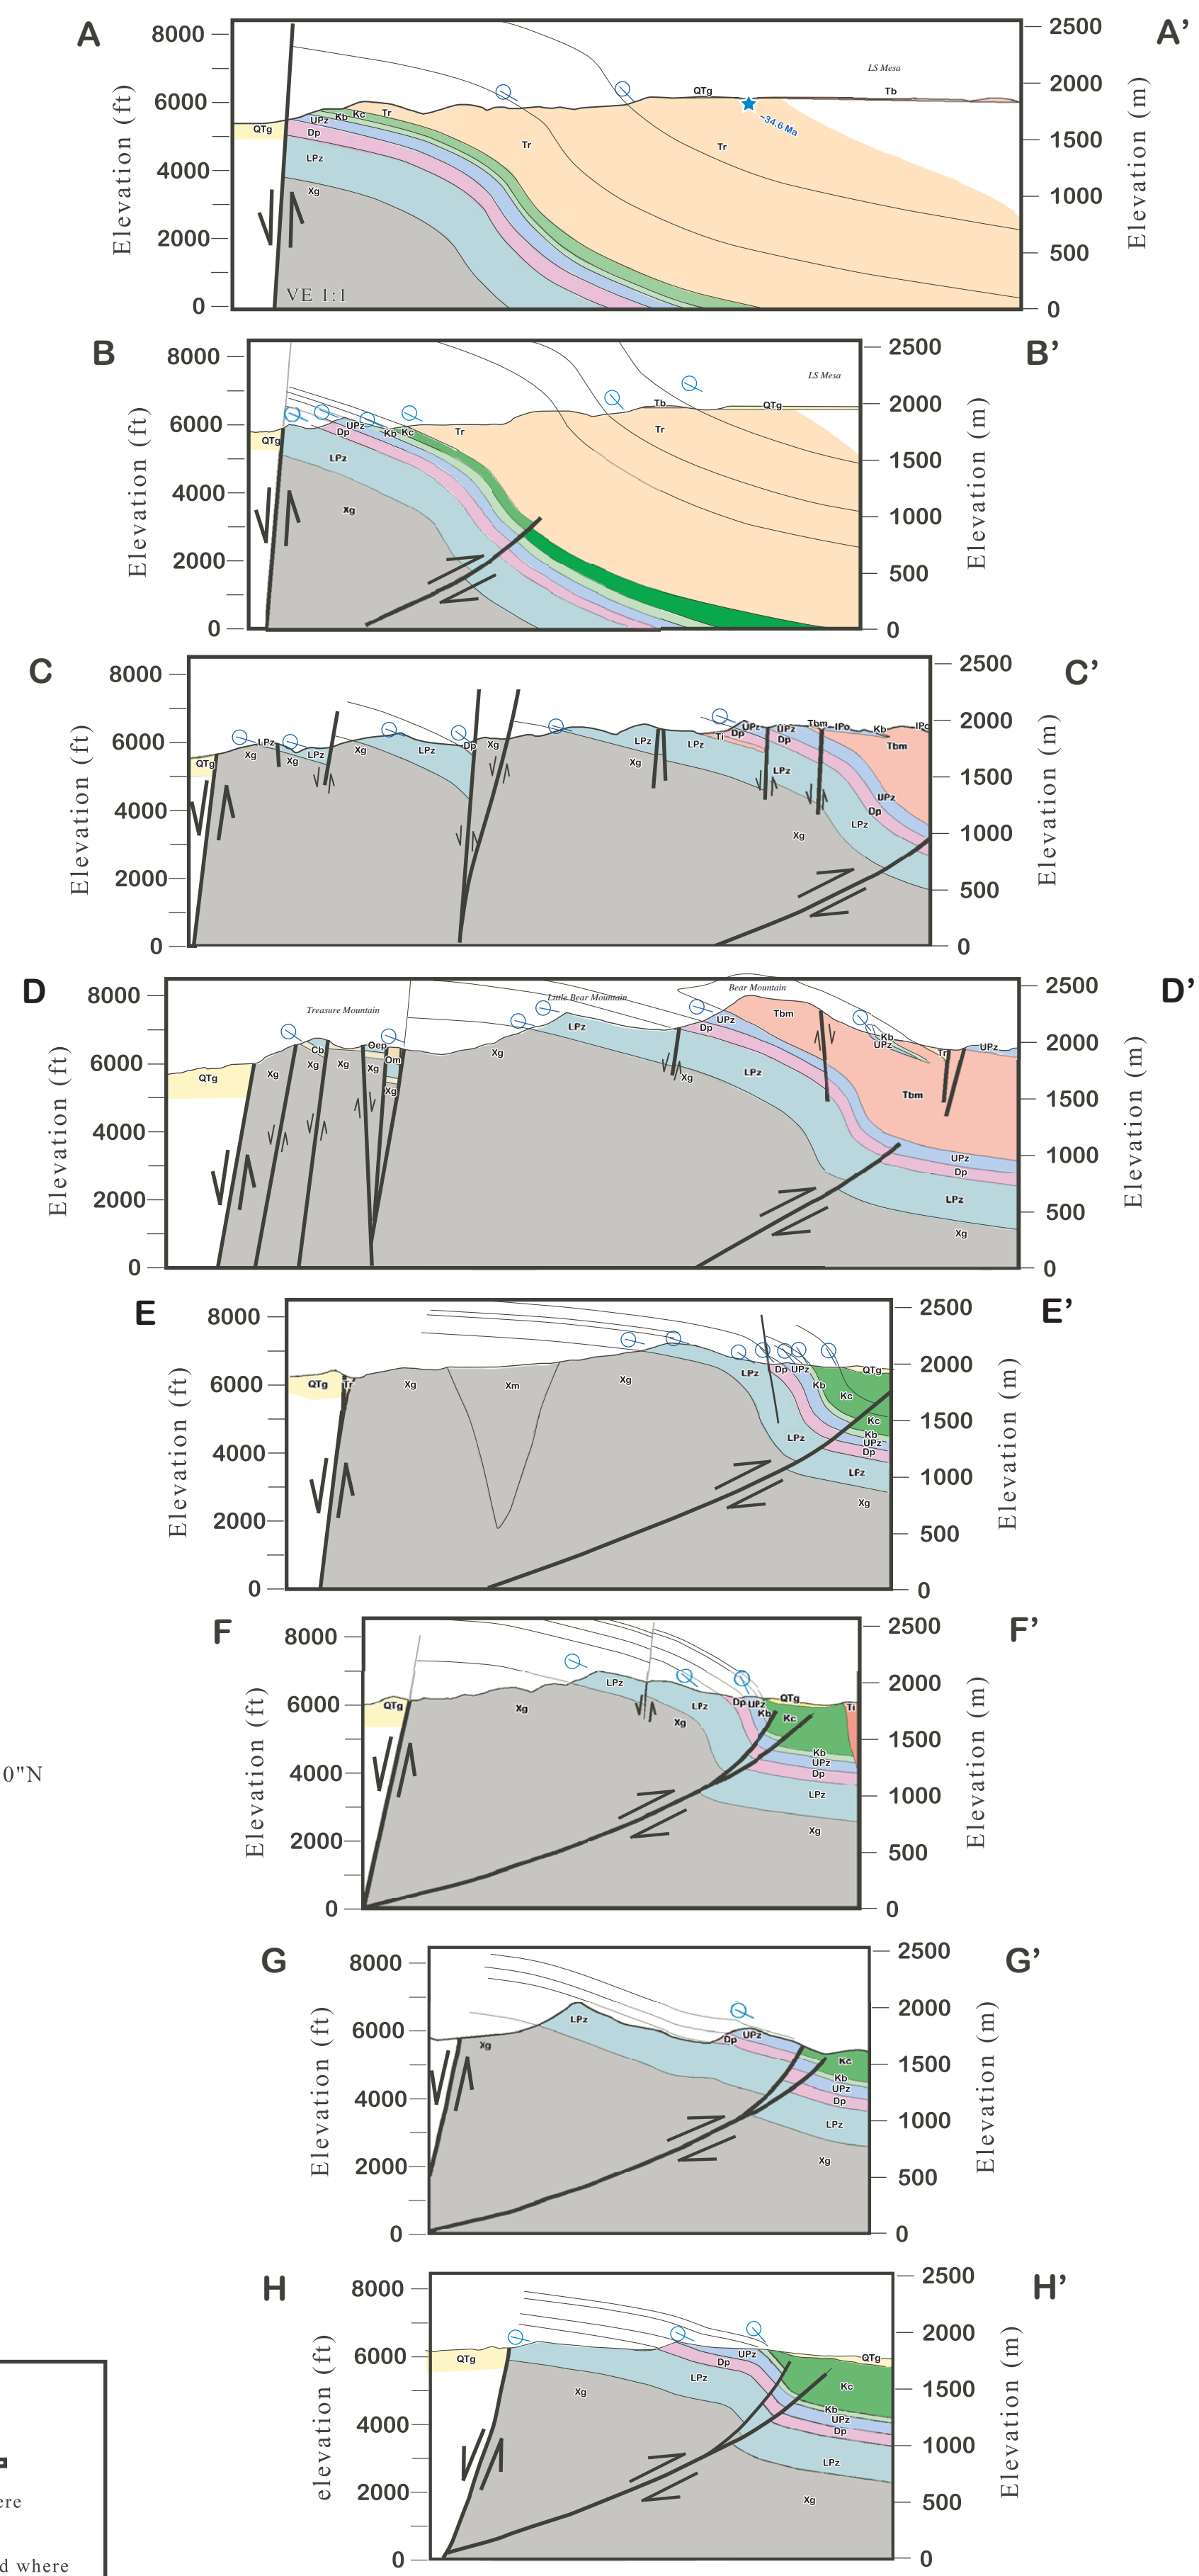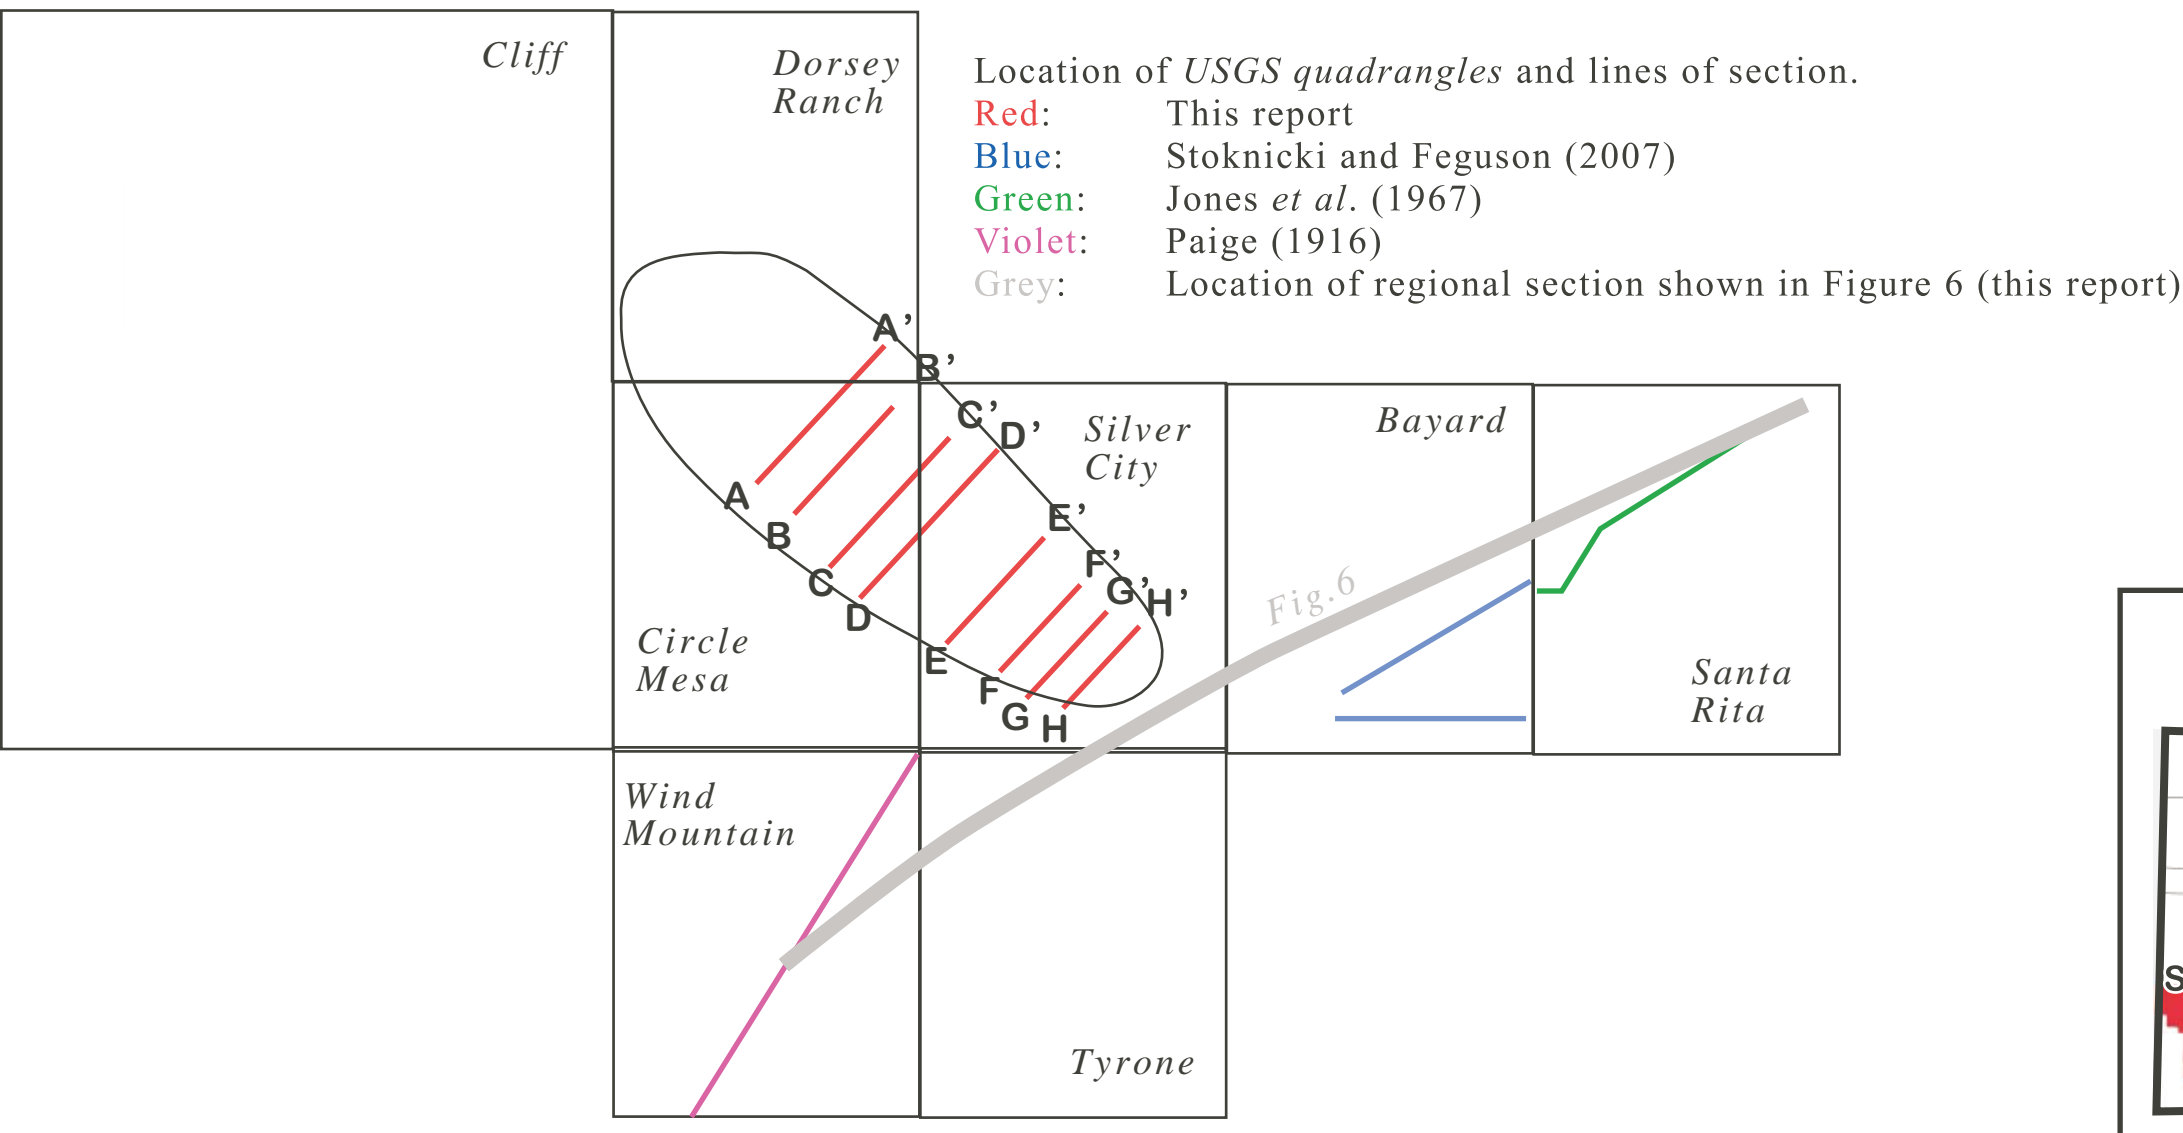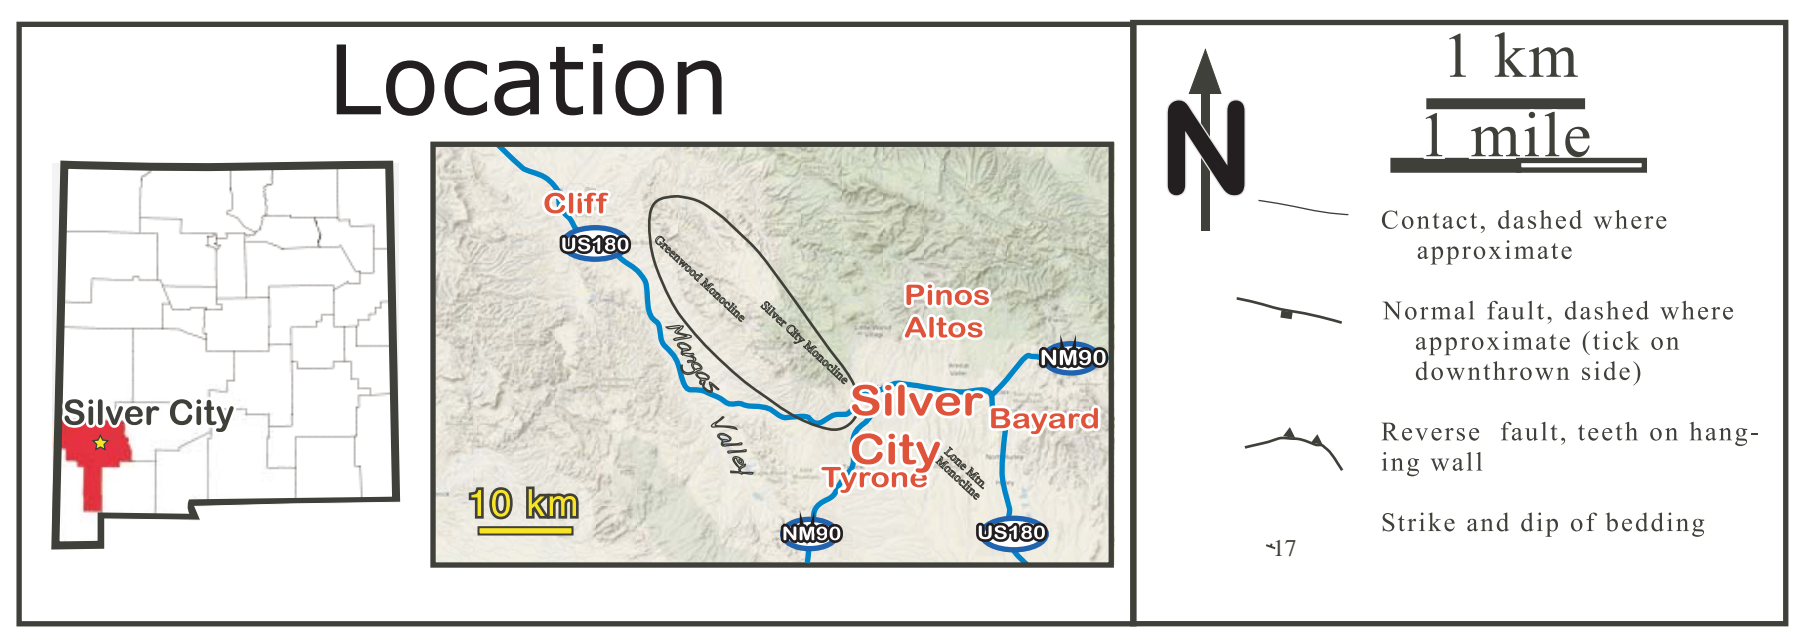

Plate 1. Geologic Map and cross sections of the Silver City Range, Grant County, NM (after Copeland *et al.*, 2010).
